# Supplementary material for: Microbial Community Analysis of Rhizosphere of Healthy and Wilted Pepper (Capsicum Annuum L.) in An Organic Farming System
Source: Research Square preprint supplement (doi:10.21203/rs.3.rs-575849/v1), 2021-06-04
Supplement: Supplementary file 1 [file 7de5ba95c9f31957d2e1ef91.docx]

***Supplementary material***

**Microbial community analysis of rhizosphere of healthy and wilted pepper (*Capsicum annuum* L.) in an organic farming system**

# Román González-Escobedo1, Laila N. Muñoz-Castellanos2, Zilia Y. Muñoz-Ramirez3, César Guigón López4, Graciela Dolores Avila-Quezada5

# 1Facultad de Zootecnia y Ecología, Universidad Autónoma de Chihuahua. Periférico Francisco R. Almada km 1, Chihuahua, Chihuahua, México, C.P. 31453.

# 2Facultad de Ciencias Químicas, Universidad Autónoma de Chihuahua, Campus II Circuito Universitario s/n, Chihuahua, Chihuahua, México, C.P. 31125.

# 3Escuela Nacional de Ciencias Biológicas, Unidad Profesional Lázaro Cárdenas, Instituto Politécnico Nacional, Ciudad de México, México, C.P. 11340.

# 4Facultad de Ciencias Agrícolas y Forestales. Universidad Autónoma de Chihuahua. km 2.5 Carretera Delicias a Rosales. Delicias, Chihuahua, México, C.P. 33000.

# 5Facultad de Ciencias Agrotecnológicas. Universidad Autónoma de Chihuahua, Campus I s/n, Chihuahua, Chihuahua, México, C.P. 31350.

# Corresponding author:

# Graciela Dolores Avila-Quezada: email: gavilaq@gmail.com

**
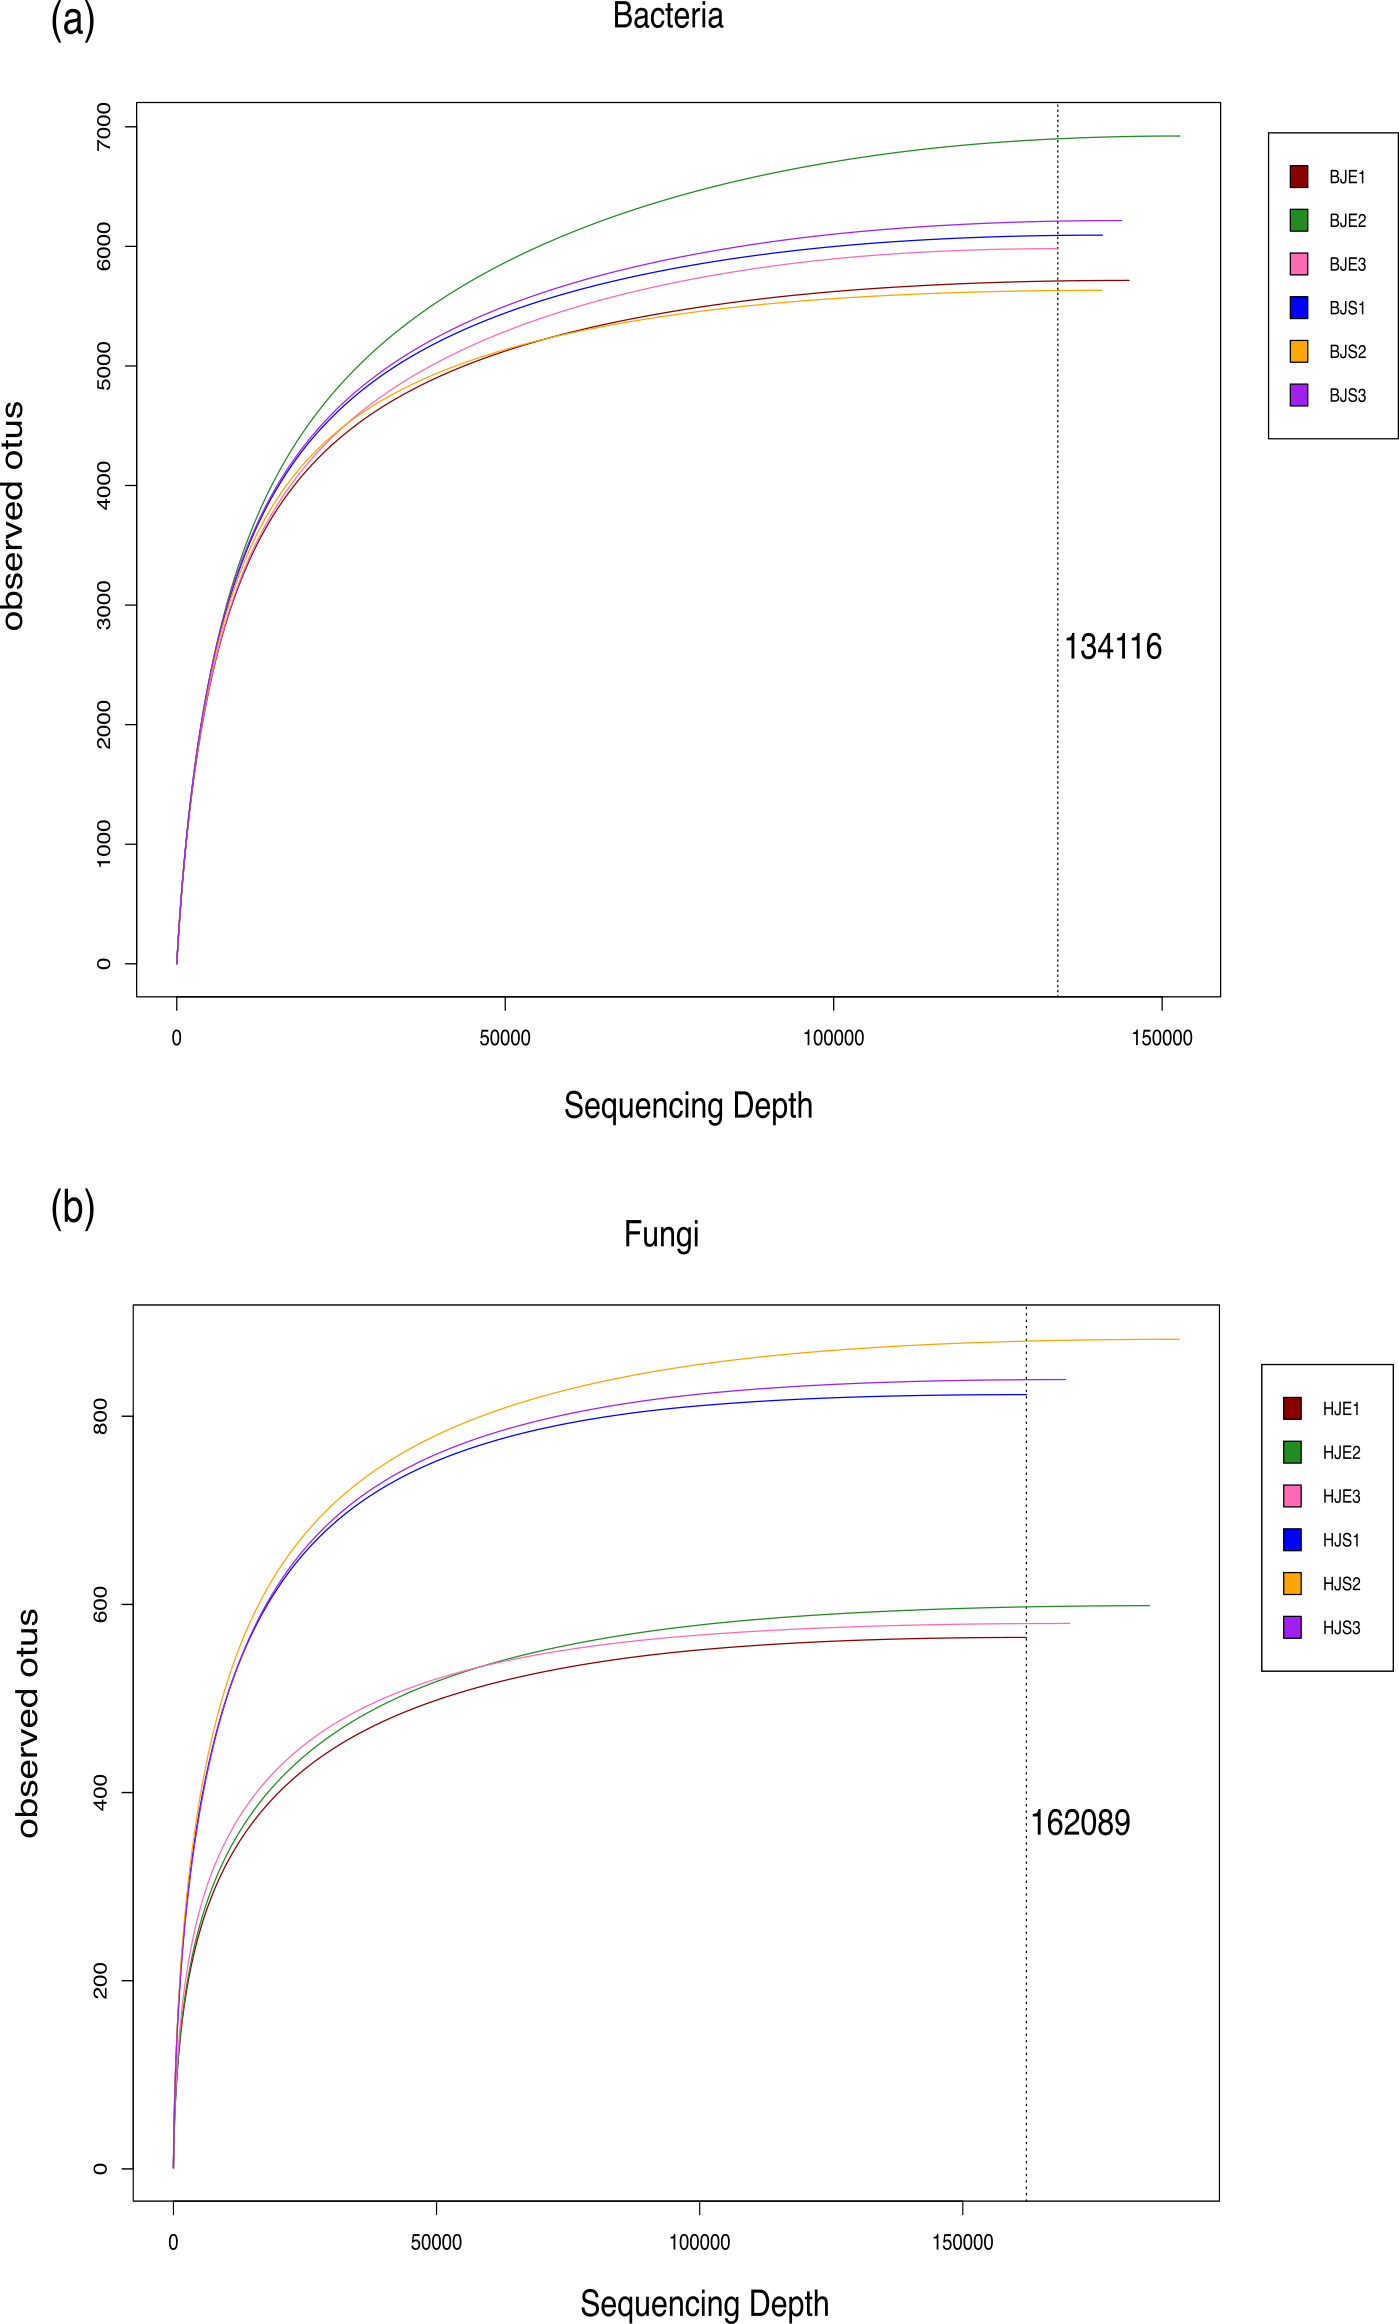
**

**Supplementary Fig. 1.** Rarefaction curves of bacterial (a) and fungal (b) communities.


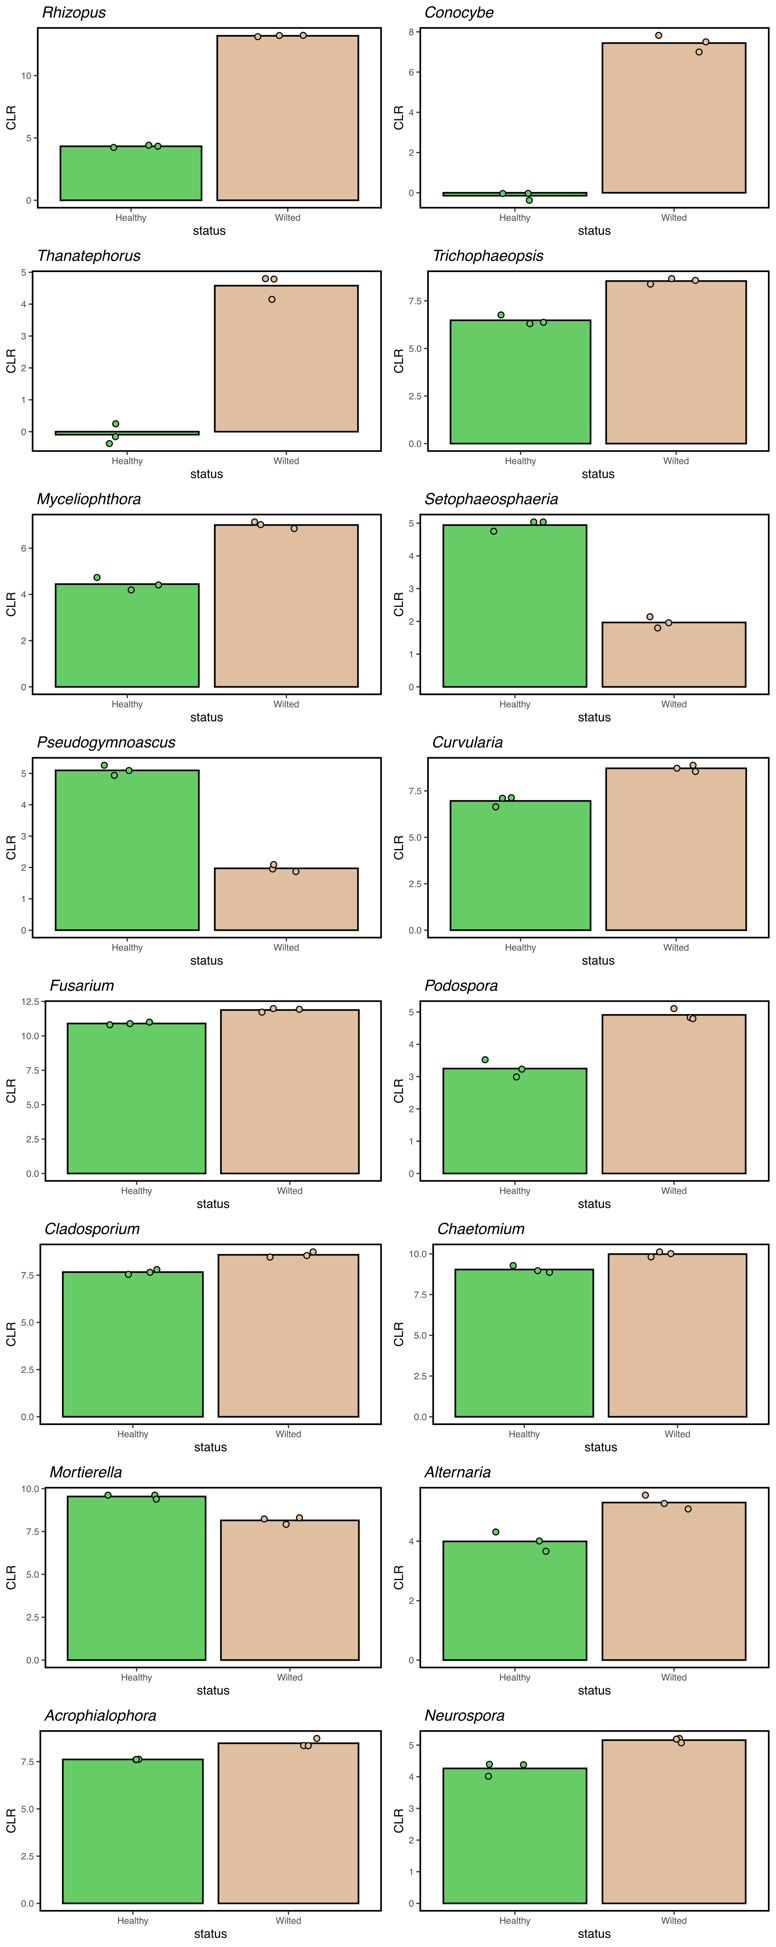


**Supplementary Fig. 2.** Significant fungal genera based on the differential abundance analysis.
